# Supplementary material
Source: HighWire-hosted journal article supplement (http://ajnr-stage2.highwire.org/highwire/filestream/104545/field_highwire_adjunct_files/0/0266.pdf)

**Supplementary Fig. 1. Euclidean distance between fASL and BOLD in the individual space. A)**

Euclidean distance between fASL and BOLD for MAX (red line) and CoG (orange line) for each subject. **B)** Boxplots of the Euclidian distances between the MRI modalities for each hand, in terms of CoG and MAX.

**Supplementary Fig. 2. fASL versus BOLD.** Violin plots represent the localization across all brain directions of MAX and CoG obtained from fASL and BOLD activation maps during clenching Fi hand task. \*:p<0.05; \*\*\*:p<0.001.

**Supplementary Fig. 3. TMS-MRI comparison.** The Euclidean distance between TMS and *f*ASL is lower than the Euclidean distance between TMS and BOLD. Significance is achieved only for the left hand when the MAX value of activation was taken into consideration. \* $p < 0.05$ .

**Supplementary Fig. 4. TMS-MRI comparison along brain anatomical directions.** Each violin plot represents the distance to TMS of *f*ASL/BOLD along each coordinate. Results are shown for both MAX and CoG and each hand. \* $p < 0.05$ .

**Supplementary Fig. 5. Results of pneumatic stimulation.** Activations at group level are shown for the BOLD and *f*ASL for right (top row) and left (bottom row) thumb. The location of the global maximum of activation are specified in MNI coordinates.

Supplementary Fig. 1

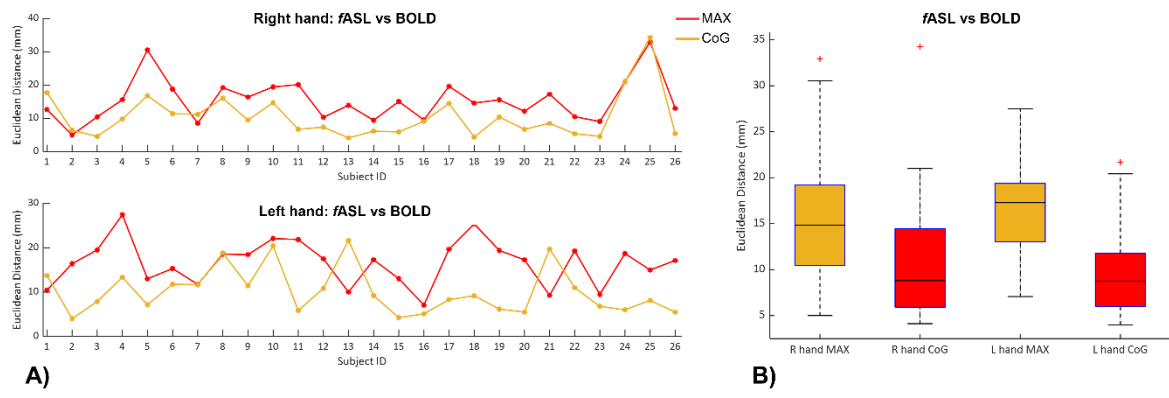

Supplementary Fig. 2

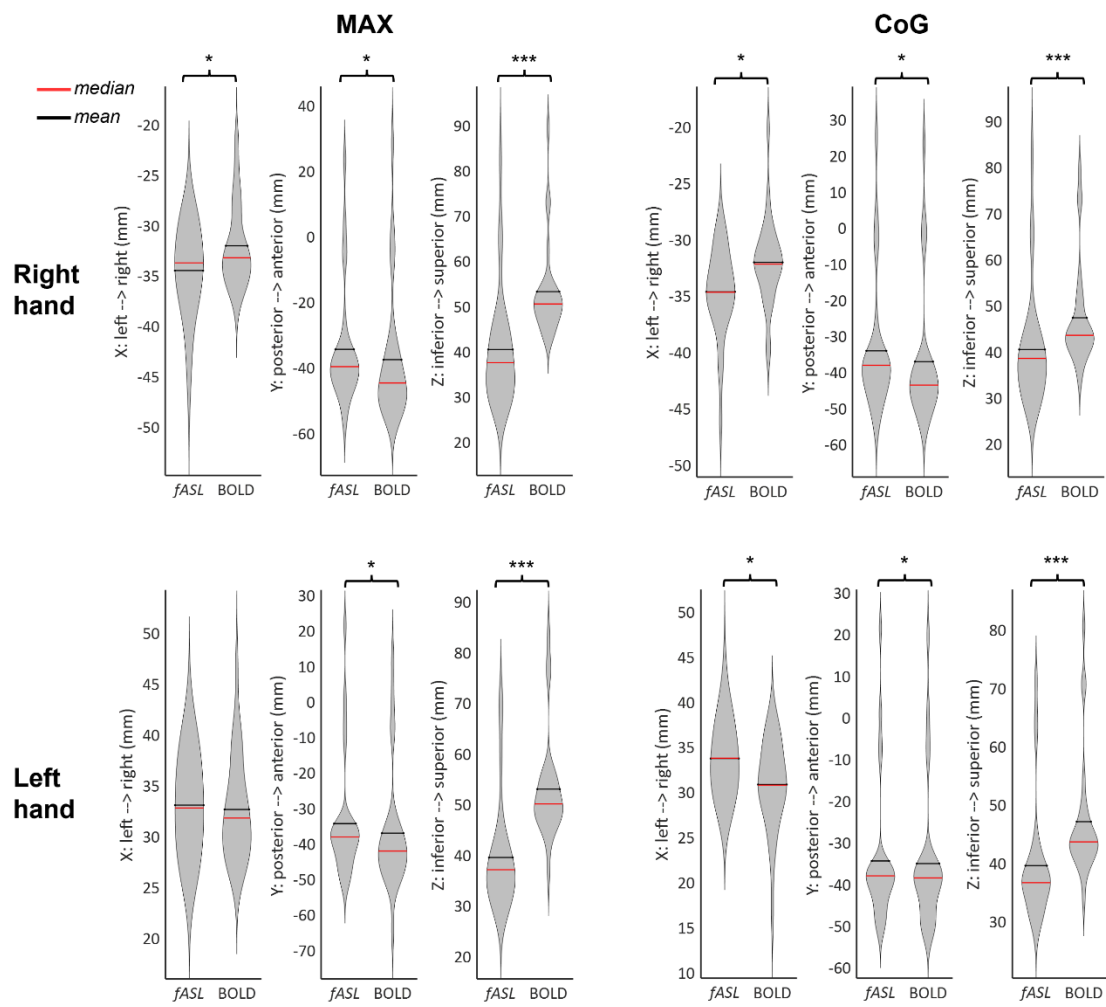

Supplementary Fig. 3

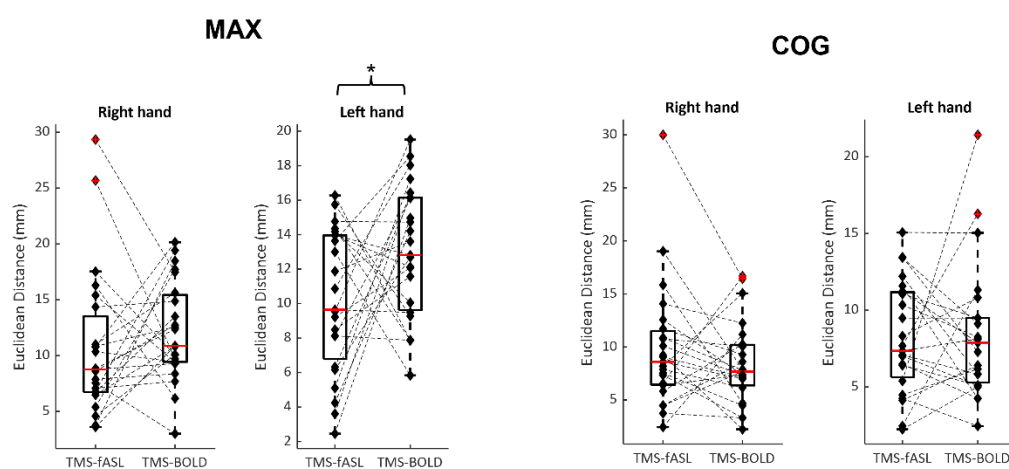

Supplementary Fig. 4

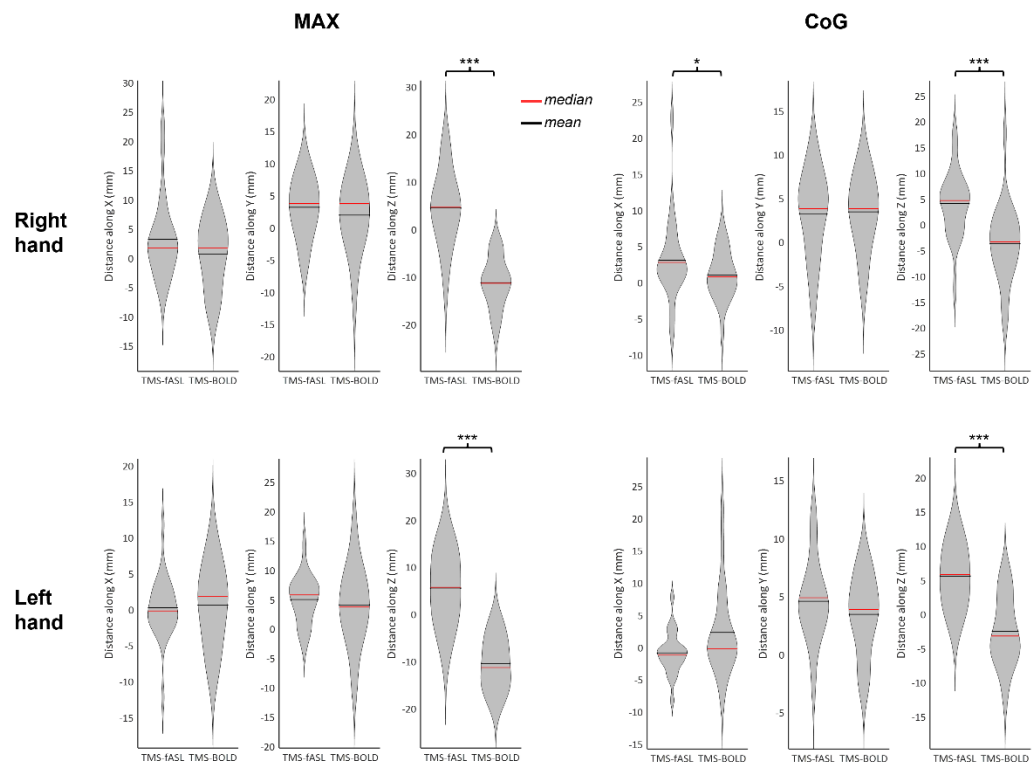

Supplementary Fig. 5

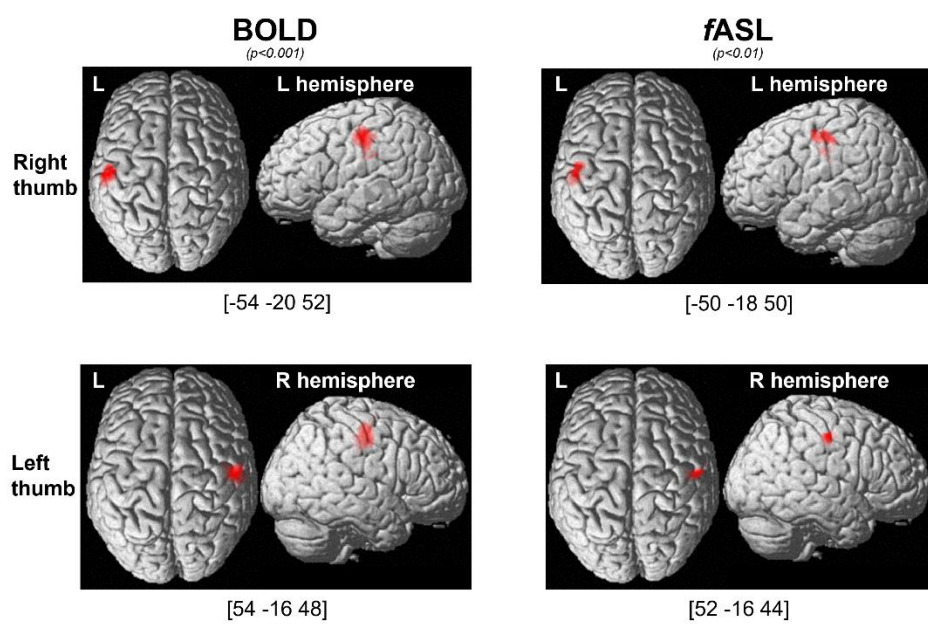

Supplement: 0266.pdf [file 0266.pdf]
